# Supplementary material for: Work-related Stress and Coping Profiles among Workers in Outer Garment Sector; A Cross-sectional study
Source: Preprints.org preprint supplement (doi:10.20944/preprints201802.0061.v1), 2018-02-07
Supplement: Supplementary file 1 [file supplementary]

**TITLE PAGE**

**Title:** Work-related Stress and Coping Profiles among Workers in Outer Garment Sector; A Cross-sectional study

**Running Title:** Work-related Stress and Coping Profiles

**Type of research:** Original research

**The Authors:**

**Corresponding to:** Ozlem Koseoglu ORNEK1

Ozlem Koseoglu ORNEK, Assistant Professor, PhD, RN**1**

Erdem Sevim, PhD student**2**

**1**Assistant Prof. Ozlem Koseoglu Ornek,

Department of Nursing, Faculty of Health Sciences, Istanbul Bilgi University.

**Address: Dolapdere Kampus**, Hacıahmet Mahallesi, Pir Hüsamettin Sokak No: 20, 34440 Beyoğlu/ Istanbul/Turkey

Telephone: + (90)212 311 50 00-5207 / +90 539 235 95 42

E mail: [ozlem.koseoglu@bilgi.edu.tr](mailto:ozlem.koseoglu@bilgi.edu.tr), [ozlem.koseoglu62@gmail.com](mailto:ozlem.koseoglu62@gmail.com)

**2 *Research Assistant, Phd Student, Erdem Sevim***

Research Assistant, Department of Psychology Counseling and Guidance, Marmara University,

Adress: Göztepe Kampus, Fahrettin Gökay cad. 34722, Kadıköy/ İstanbul

Telephone: +90 530 326 46 57

E mail: erdemsvm@hotmail.com
